# Supplementary material for: Maintenance fluid therapy and fluid creep impose more significant fluid, sodium, and chloride burdens than resuscitation fluids in critically ill patients: a retrospective study in a tertiary mixed ICU population
Source: Springer Nature journal article supplement (doi:10.1007/s00134-018-5147-3), 2018-03-26
Supplement: MOESM1 [file 15570754]

Supplementary File 1

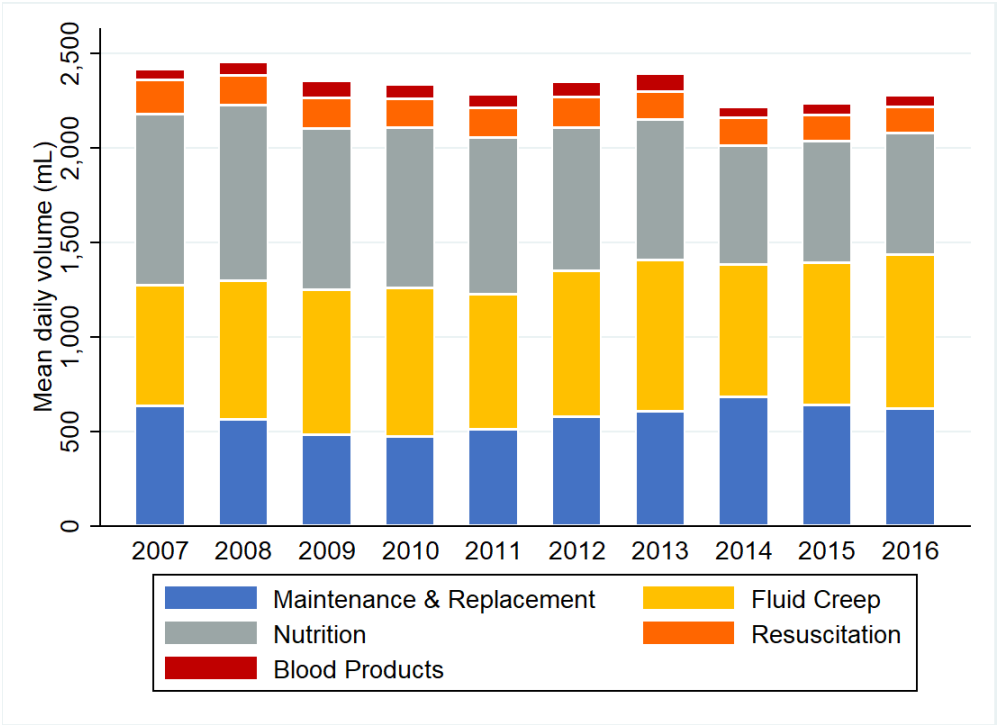

Figure S1a: Mean daily fluid volumes over a 10-year period. Mean duration of an average ICU-day  $20.3 \pm 6.7$ h. Decrease in nutritional volume can be explained by the use of more concentrated forms of enteral nutrition.

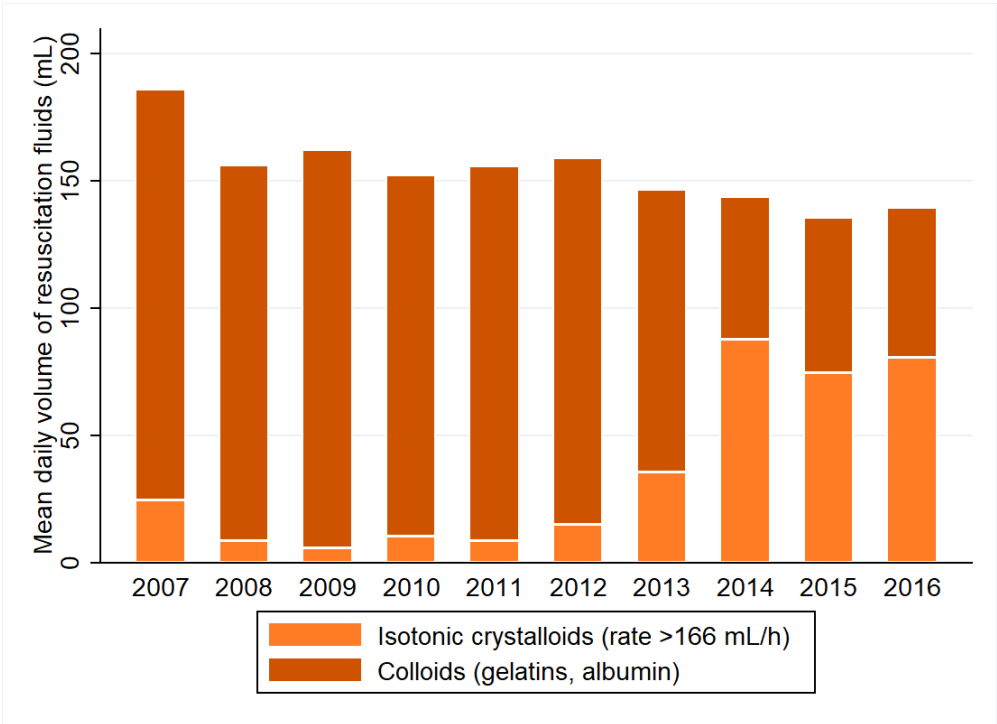

Figure S1b: Detail of Figure S1a showing only mean daily volumes of resuscitation fluids over a 10-year period. After the pivotal 6S and CHEST trials in 2012, colloid use (mainly gelatins and human albumin 20%) quickly decreased in favor of isotonic crystalloids (mainly PlasmaLyte 148)
