# Supplementary material for: Maintenance fluid therapy and fluid creep impose more significant fluid, sodium, and chloride burdens than resuscitation fluids in critically ill patients: a retrospective study in a tertiary mixed ICU population
Source: Springer Nature journal article supplement (doi:10.1007/s00134-018-5147-3), 2018-03-26
Supplement: MOESM2 [file 15570754]

## Supplementary File 2

|                                    |                         |         |
|------------------------------------|-------------------------|---------|
| Mixed-effects ML regression        | Number of observations  | 4,171   |
| Group variable: Individual patient | Number of groups        | 1,229   |
|                                    | Observations per group: |         |
|                                    | minimum                 | 1       |
|                                    | average                 | 3.4     |
|                                    | maximum                 | 20      |
|                                    | Wald chi2(8)            | 4778.99 |
| Log likelihood = -37298.01         | Prob > chi2             | 0.0000  |

| Cumulative fluid balance                      | Coefficient | Std. Err. | z     | P>z   | 95% Conf. Interval |        |
|-----------------------------------------------|-------------|-----------|-------|-------|--------------------|--------|
| Non-resuscitation fluids (mL)                 | 0.50        | .018      | 27    | 0.000 | .46                | .53    |
| Cumulative duration of ICU stay (hours)       | -8.57       | 1.43      | -6.0  | 0.000 | -11.34             | -5.78  |
| Interaction term (non-resusc fluids*duration) | -.0006      | .000      | -10.6 | 0.000 | -.0007             | -.0005 |
| Resuscitation fluids (mL)                     | 0.999       | .05       | 21.7  | 0.000 | .908               | 1.09   |
| Interaction term (resusc fluids*duration)     | .0013       | .0003     | 4.83  | 0.000 | .0008              | .0019  |
| SAPS-3 score                                  | 20.7        | 3.8       | 5.33  | 0.000 | 13.1               | 28.3   |
| Intercept                                     | -1281       | 249.4     | -5.14 | 0.000 | -1770              | -792   |

  

| Random-effects Parameters    | Estimate | Std. Err. | 95% Conf. Interval |         |
|------------------------------|----------|-----------|--------------------|---------|
| Individual patient: Identity |          |           |                    |         |
| var(_cons)                   | 2529101  | 124642    | 2296234            | 2785582 |
| var(Residual)                | 2238271  | 56118     | 2130941            | 2351007 |

LR test vs. linear model: chibar2(01) = 2301.39 Prob >= chibar2 = 0.0000

Table S2a: Linear mixed-effects model for cumulative fluid balance during ICU stay in medical patients admitted with sepsis. Fixed effects: cumulative non-resuscitation fluids (maintenance/replacement + fluid creep) + interaction with time, time, cumulative resuscitation fluids + interaction with time. Random intercept for each patient.

|                                               |             |       |       |       |       |
|-----------------------------------------------|-------------|-------|-------|-------|-------|
| Demographic data                              | n = 1,229   |       |       |       |       |
| Female (%)                                    | 501 (40.8%) |       |       |       |       |
| Age (mean in years ± SD)                      | 62.4 ± 15.3 |       |       |       |       |
| SAPS-3 (mean ± SD)                            | 63.0 ± 14.0 |       |       |       |       |
| Length of ICU stay (mean in days ± SD)        | 10.3 ± 14.4 |       |       |       |       |
| Details on administered fluids                | Day 1       | Day 2 | Day 3 | Day 4 | Day 5 |
| Non-resuscitation fluids (mean volume (mL/h)) | 92.3        | 88.8  | 80.2  | 74.1  | 70.3  |
| Resuscitation fluids (mean volume (mL))       | 521         | 332   | 155   | 118   | 78    |

Table S2b: Demographic characteristics and details on mean daily fluid volumes in the subgroup of medical patients admitted for sepsis. Figure 4 in the manuscript is a simulation based on the regression model in Table S2a and the real-life data and fluid volumes in Table S2b. To simulate daily practice, resuscitation fluids were entered as a bolus at the beginning of each ICU-day (explaining the stepwise appearance), while non-resuscitation solution (maintenance/replacement and fluid creep) were entered as a continuous rate.
